# Supplementary material
Source: PubMed Central journal article supplement (PMC5938141)

651 **Supplementary Materials: Supplemental Figure 1**

652 **Fig. S1.** Antigen reactive memory CD4+ T cells and mRNA expression profiles. **(A)**  
653 Frequency of antigen reactive cells after 2 years of desensitization treatment based on CD154 up-  
654 regulation after allergen stimulation. Participants treated with sublingual immunotherapy are  
655 displayed in green, subcutaneous immunotherapy in red and placebo in blue. An Analysis of  
656 Covariance (ANCOVA) model with baseline adjustment was used for analyzing CD154 assay  
657 data. Data are shown in the plot as means of log<sub>10</sub> fold change from baseline with 95%  
658 confidence intervals.

659 **(B)** Transcriptional analysis of extracted RNA from CD27+CD154+ and CD27- CD154+ cells  
660 at the 2-year timepoint. Transcript levels are displayed in color scale from high (yellow) to low  
661 (blue). Genes are grouped by category with Th2 in red, apoptosis in grey and Th1 related genes  
662 in purple.

1 **Supplementary Materials: Supplemental Figure 1**

2 **Fig. S1.** Antigen reactive memory CD4+ T cells and mRNA expression profiles. **(A)**  
3 Frequency of antigen reactive cells after 2 years of desensitization treatment based on CD154 up-  
4 regulation after allergen stimulation. Participants treated with sublingual immunotherapy are  
5 displayed in green, subcutaneous immunotherapy in red and placebo in blue. An Analysis of  
6 Covariance (ANCOVA) model with baseline adjustment was used for analyzing CD154 assay  
7 data. Data are shown in the plot as means of log<sub>10</sub> fold change from baseline with 95%  
8 confidence intervals.

9 **(B)** Transcriptional analysis of extracted RNA from CD27+CD154+ and CD27- CD154+ cells  
10 at the 2-year timepoint. Transcript levels are displayed in color scale from high (yellow) to low  
11 (blue). Genes are grouped by category with Th2 in red, apoptosis in grey and Th1 related genes  
12 in purple.  
13

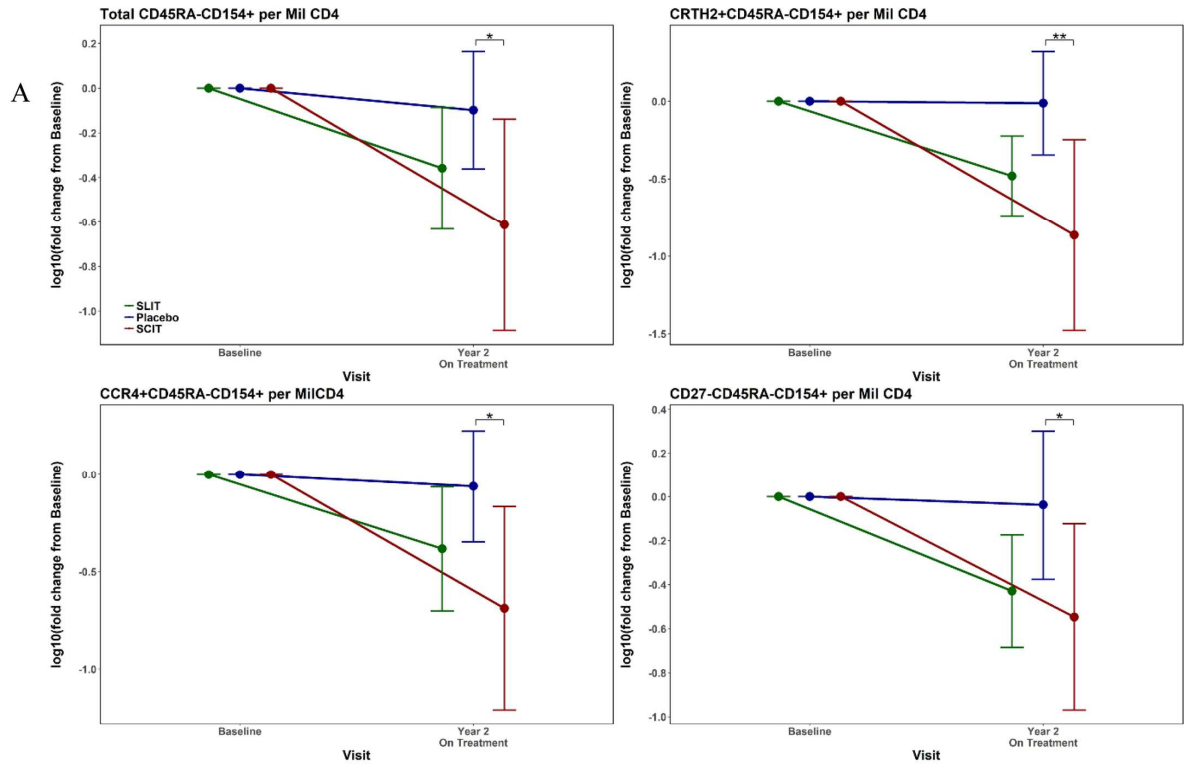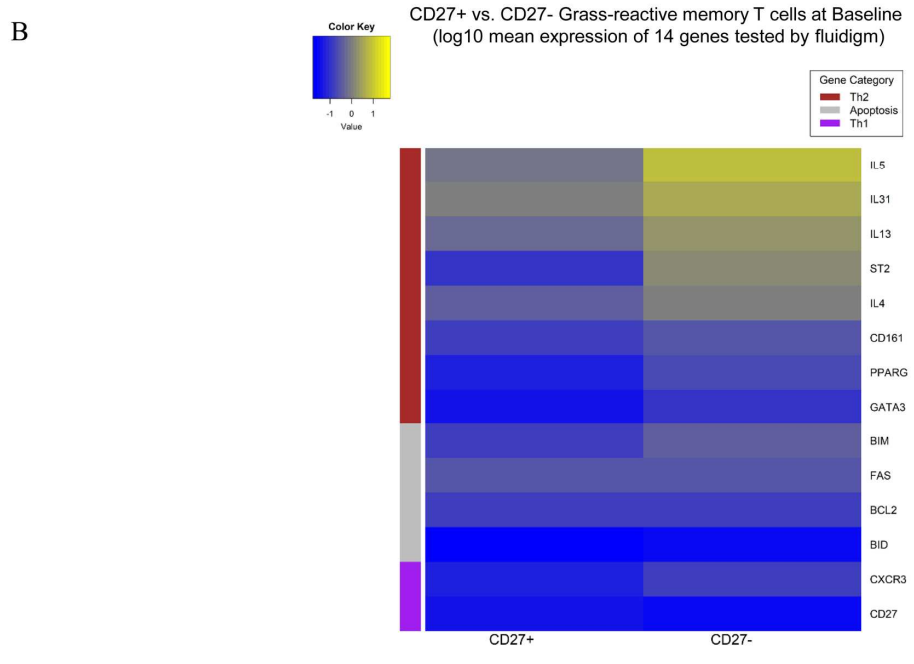

Supplement: NIHMS919100-supplement-supplement_1.pdf [file NIHMS919100-supplement-supplement_1.pdf]
